# Supplementary material
Source: publisher site journal article supplement (https://www.dovepress.com/article/442143)
Supplement: Supplementary file 1 [file get_supplementary_file.php]

**Supplementary Information for**

**Lipid-based self-microemulsion of niclosamide achieved enhanced oral delivery and anti-tumor efficacy in orthotopic patient-derived xenograft of hepatocellular carcinoma in mice**

Yi Liu1, David Quintanar Guerrero2, David Lechuga-Ballesteros3, Mingdian Tan1, Faiz Ahmad1, Bilal Aleiwi4, Edmund Ellsworth4, Bin Chen4, Mei-Sze Chua1, Samuel So1

1Department of Surgery, School of Medicine, Stanford University, Stanford, CA, USA.

2Laboratorio de Investigación y Posgrado en Tecnologías Farmacéuticas, Facultad de Estudios Superiores Cuautitlán, Universidad Nacional Autónoma de México, Cuautitlán Izcalli CP 54745, Mexico

3AstraZeneca Pharmaceuticals, Ltd. 4222 Emperor Boulevard, Durham, NC, USA.

4Department of Pharmacology and Toxicology, Michigan State University, East Lansing, MI, USA.

**Corresponding author:**

**Mei-Sze Chua, PhD**

Senior Scientist

Email: [mchua@stanford.edu](mailto:mchua@stanford.edu)


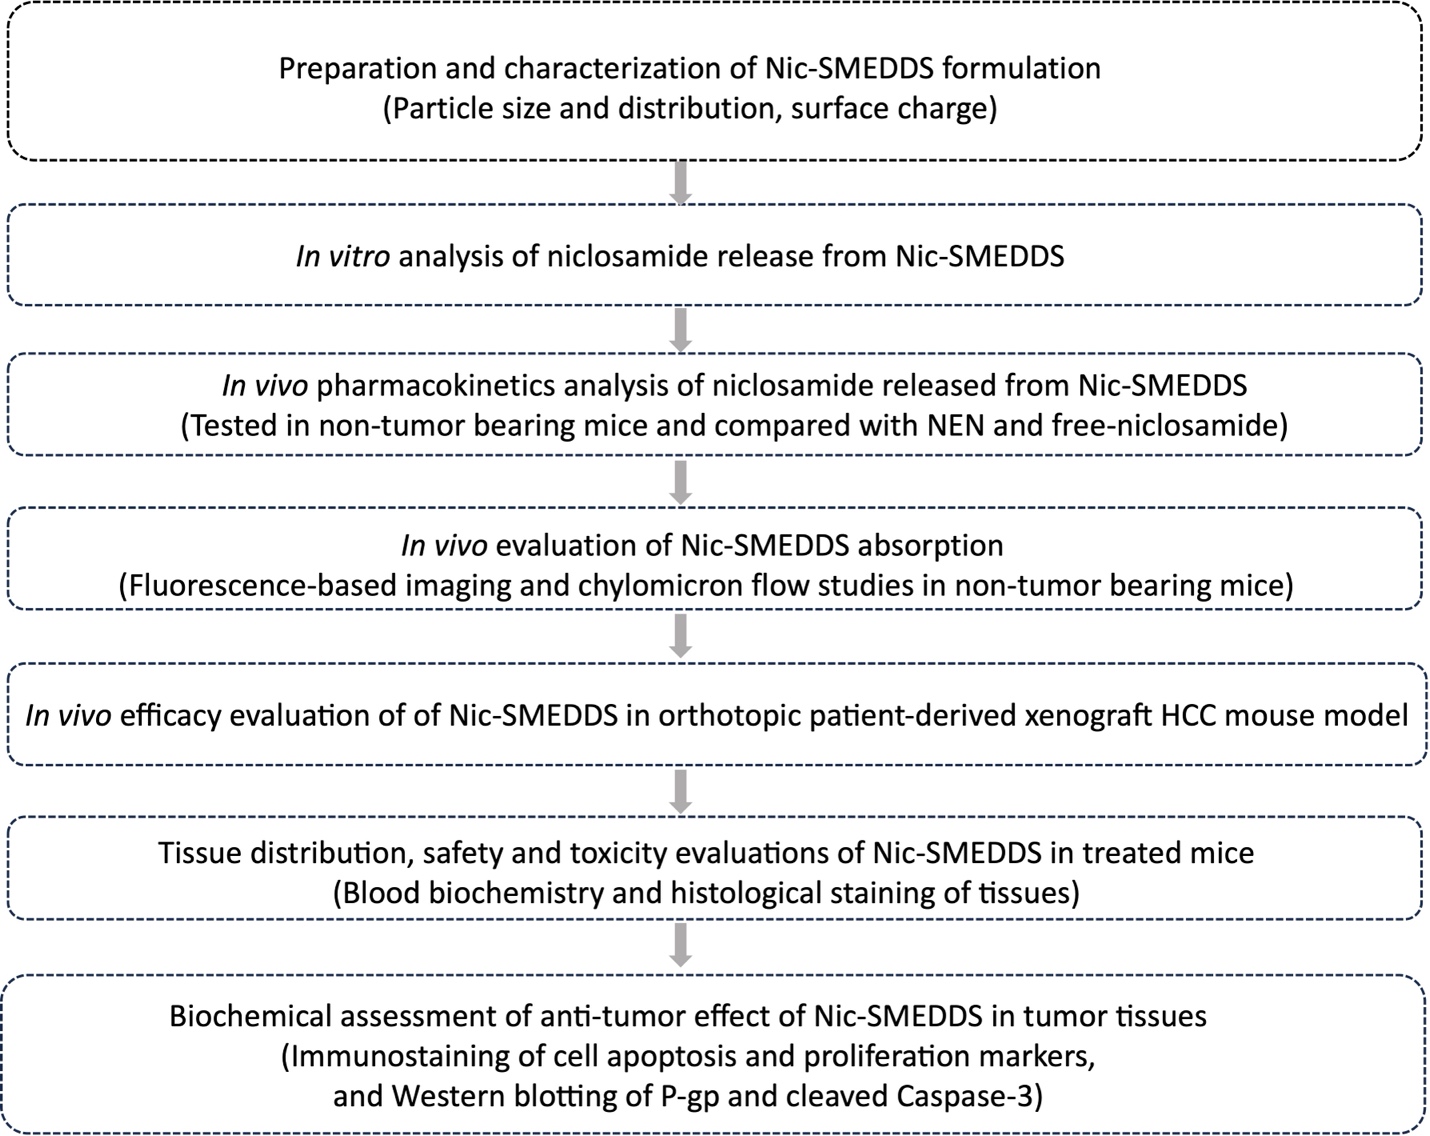


**Schematics. Flow chart of experimental processes in the evaluation of Nic-SMEDDS for its physicochemical and absorption characteristics, and anti-tumor effects.**

**
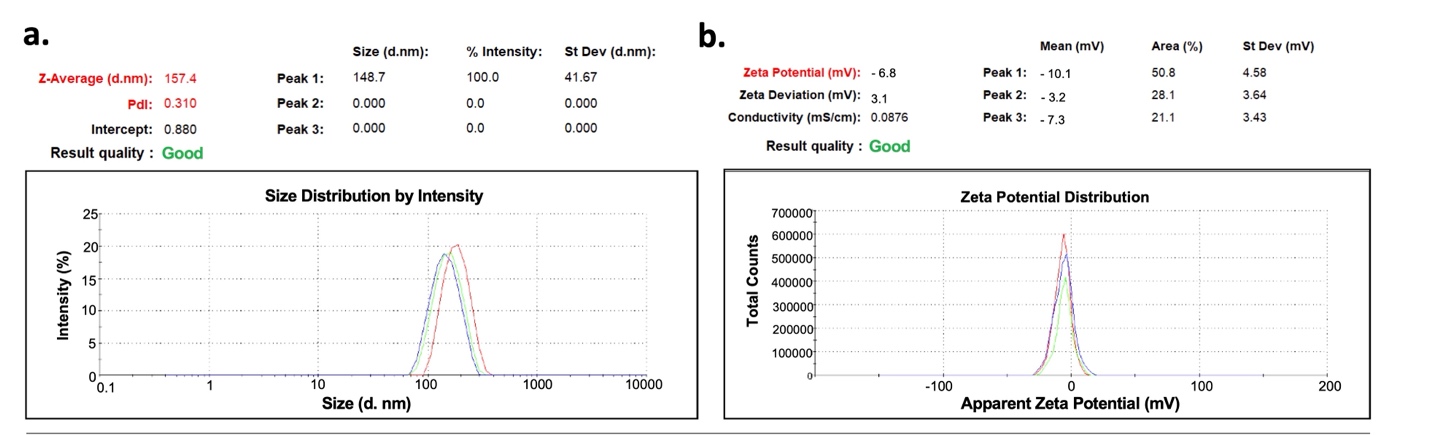
**

**Figure S1.** **Characterization of Nic-SMEDDS particles by Dynamic Light Scattering.** **(a)** Particle size of Nic-SMEDDS is an average 157.4 nm; **(b)** Surface charge (ζ potential) of Nic-SMEDDS is -6.8mV. The Nic-SMEDDS formulation was diluted 1:100 (%v/v) with deionized water before measurements.


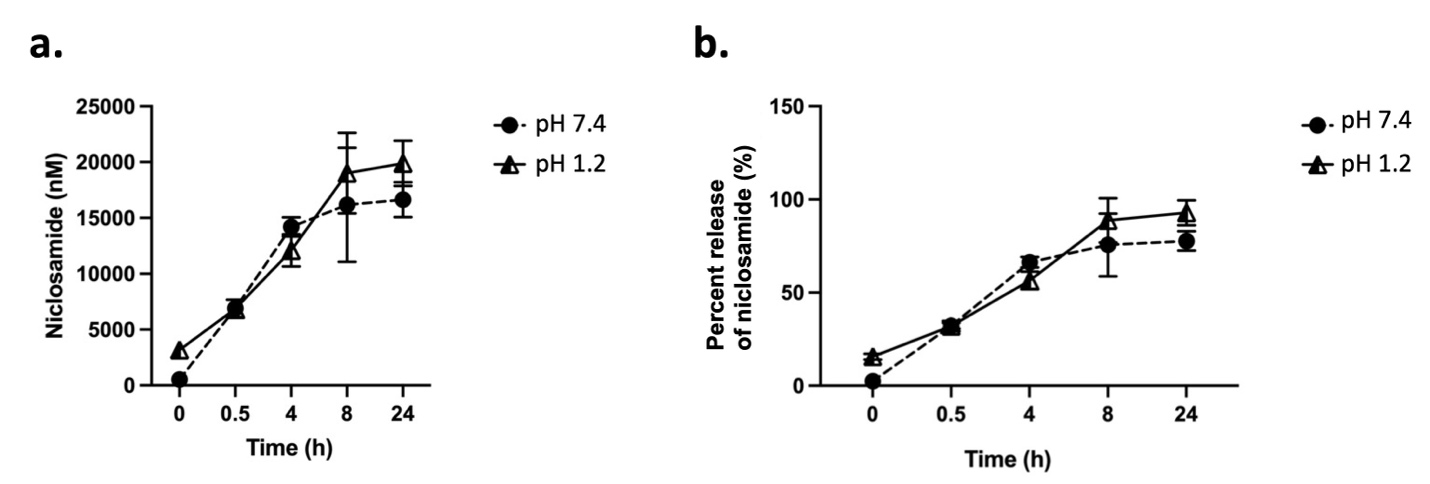


**Figure S2. *In vitro* release of niclosamide from Nic-SMEDDS. (a).** Niclosamide concentrations detected from the release media and its cumulative release profile over time from Nic-SMEDDS at pH 7.4 and pH 1.2 (n = 3, data were plotted as mean ± SEM). **(b).** The total amount of niclosamide released, expressed as percentage of the total amount loaded in the Nic-SMEDDS: 77.7 ± 5.16% (pH 7.4), and 92.89 ± 6.68% (pH 1.2) within 24 h.


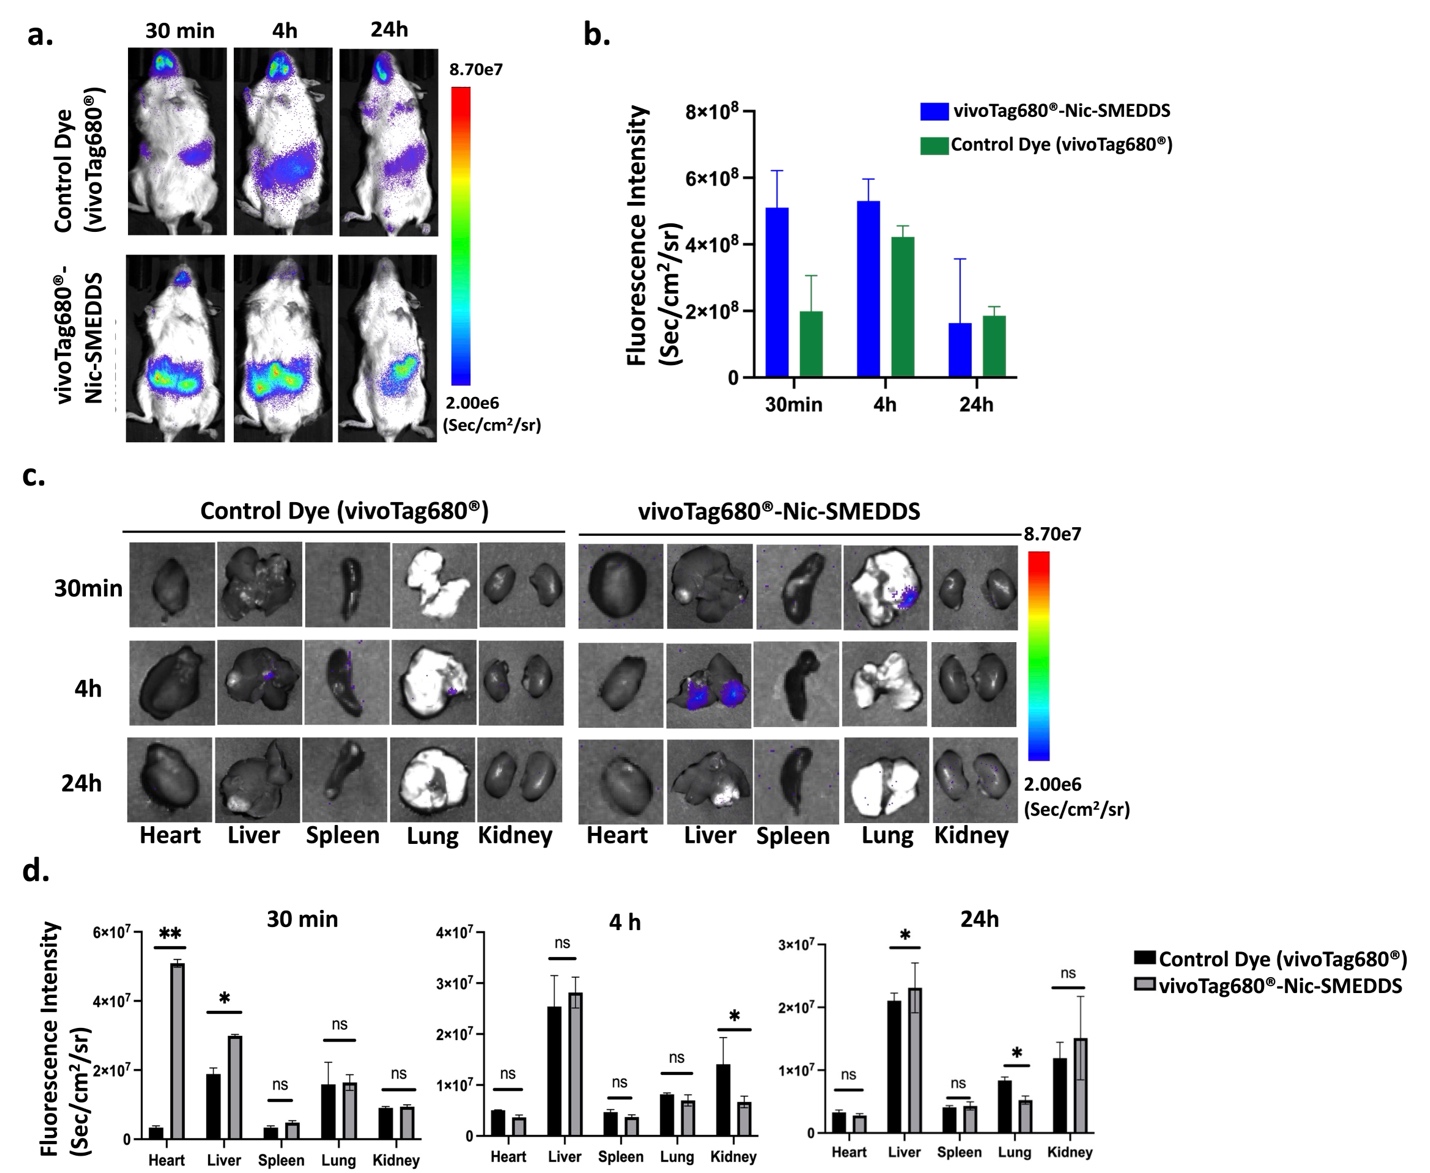


**Figure S3. *In vivo* biodistribution and organ accumulation of Nic-SMEDDS.** **(a)** vivoTag680Ò-Nic-SMEDDS was orally administered to NSG mice, and IVIS imaging was done at 30 min, 4 h, and 24 h after. **(b)** Quantitative analysis of vivoTag680Ò fluorescence signals from **(a)**. **(c)** *Ex vivo* images of mouse organs and tumors were taken by the IVIS imaging 48 hours post-injection of vivoTag680Ò-labeled-Nic-SMEDDS. **(d)** vivoTag680Ò fluorescence signals quantified from **(c)**. Data were plotted as mean ± SEM (n = 3), one-way ANOVA was used for statistical analysis; * denotes *p* < 0.05; ** denotes *p* < 0.01; ns denotes no significance.


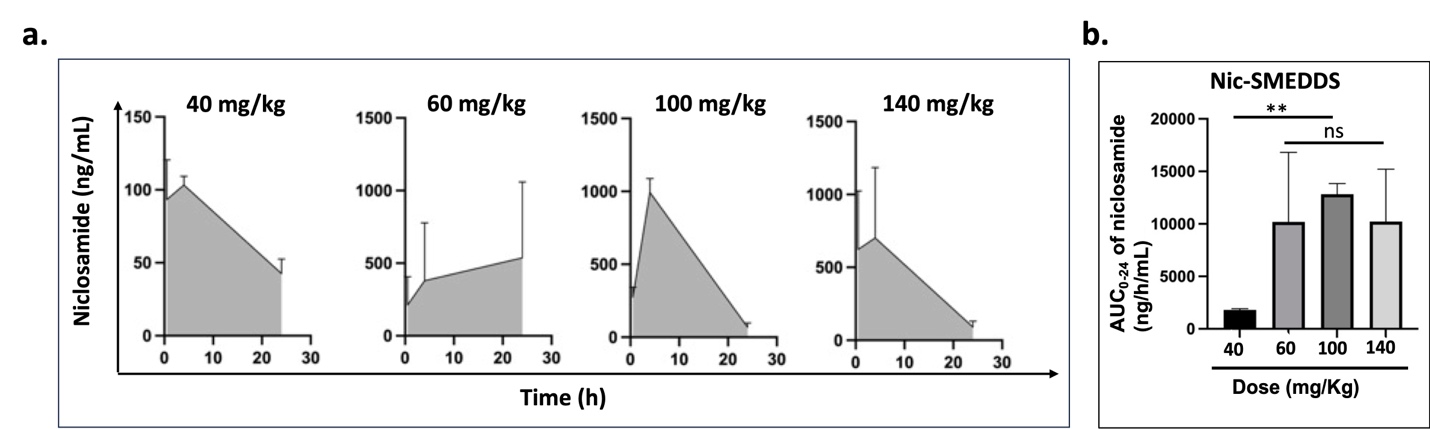


**Figure S4. *In vivo* pharmacokinetics of Nic-SMEDDS at multiple dosages. (a)** Plasma concentration of niclosamide following oral administration of Nic-SMEDDS at a single dose of 40, 60, 100, or 140 mg/kg (equivalent to molecular weight of NEN). **(b)** Analysis of the niclosamide AUC (0–24) achieved by different doses of Nic-SMEDDS (median ± SEM): 1803.1 ± 127.3 ng/h/mL for the 40 mg/kg group; 10193.2 ± 6622.1 ng/h/mL for the 60 mg/kg; 12818.6 ± 1023.4 ng/h/mL for 100 mg/kg group; and 10233.5 ± 4971.7 ng/h/mL for the 140 mg/kg group.Data were plotted as mean ± SEM (n = 3), ** denotes *p* < 0.01; ns denotes no significance.

**
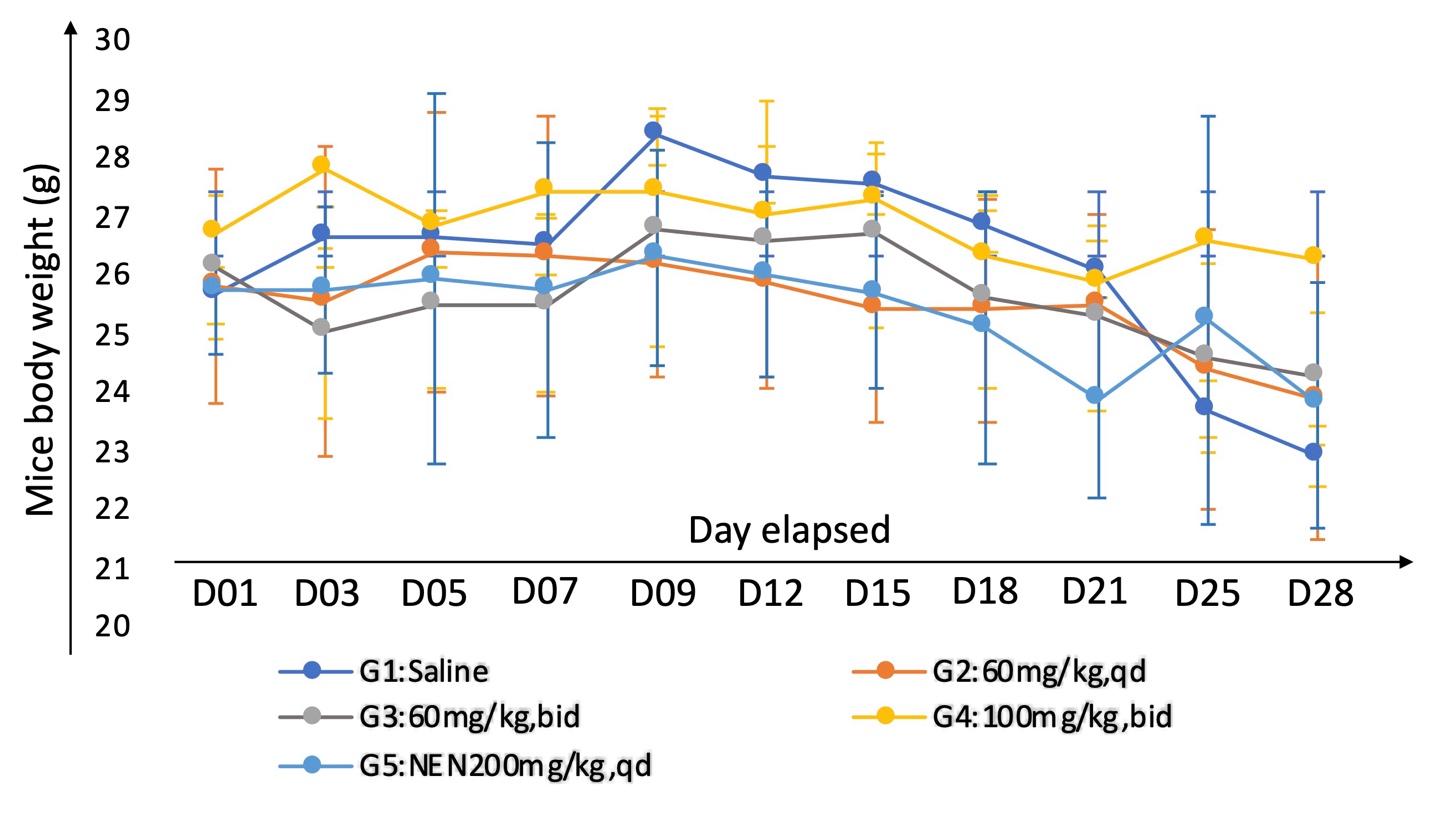
**

**Figure S5. Mice body weight changes throughout the treatment period.** Data were plotted as mean ± SD, n = 6.

**
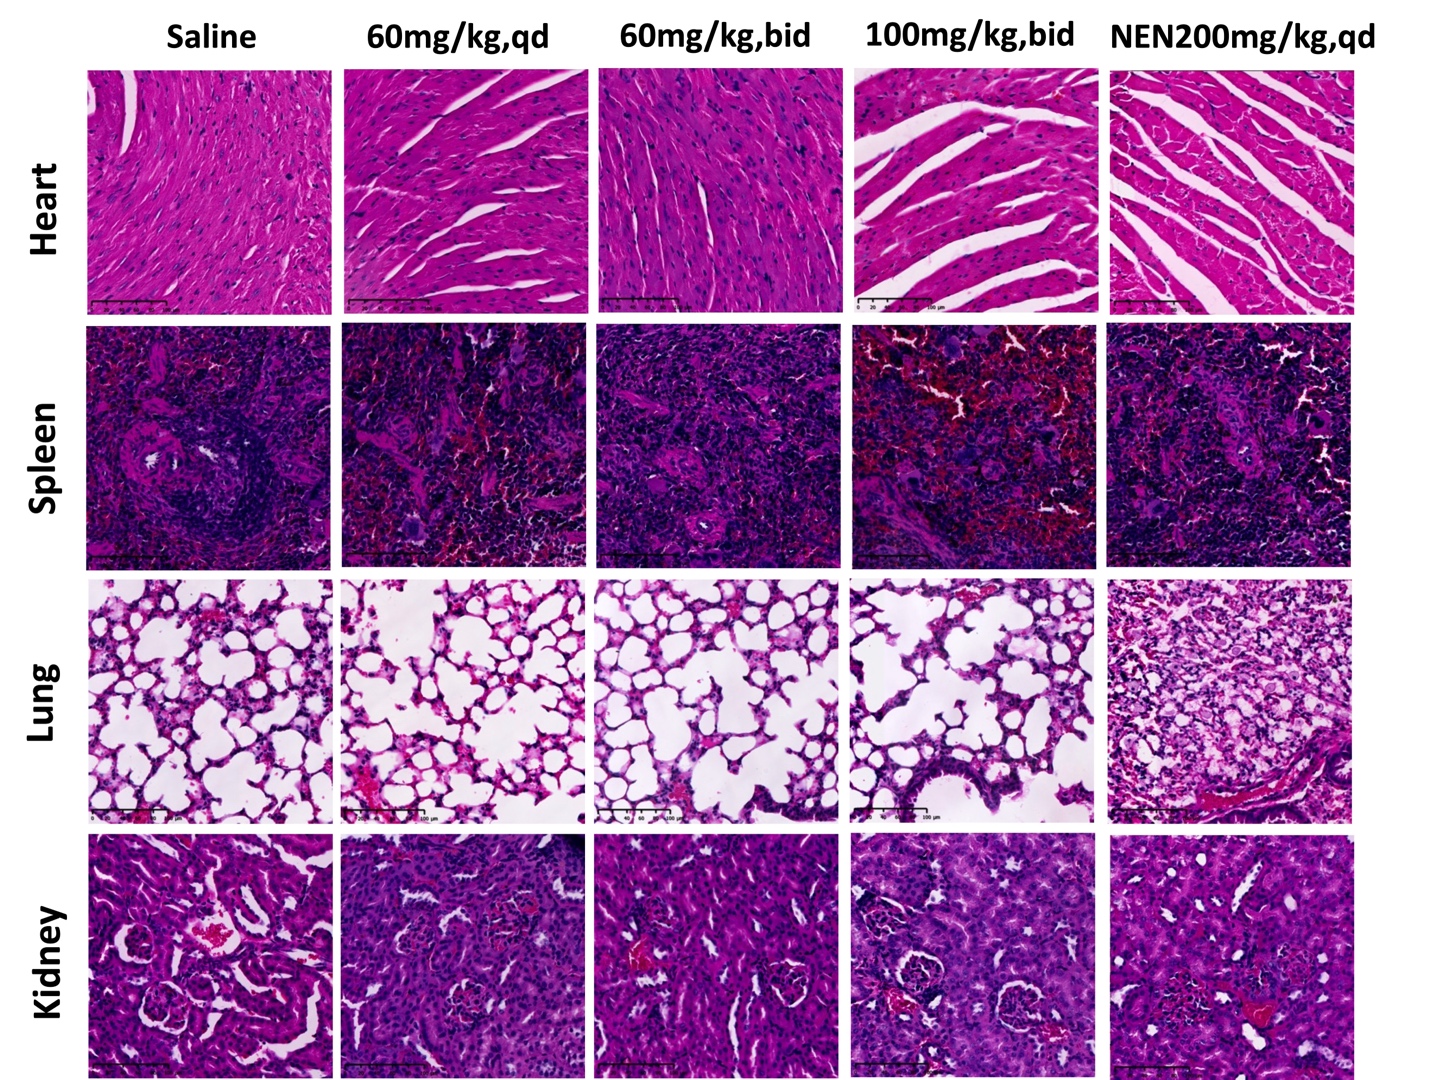
**

**Figure S6. Histologic H&E-stained sections of major organs harvested from mice in each group at the end of the treatment perio**d. While NEN at 200 mg/kg was associated with changes in the lung alveoli, no other discernible effects were observed in the Nic-SMEDDS treatment groups in any organ.

**
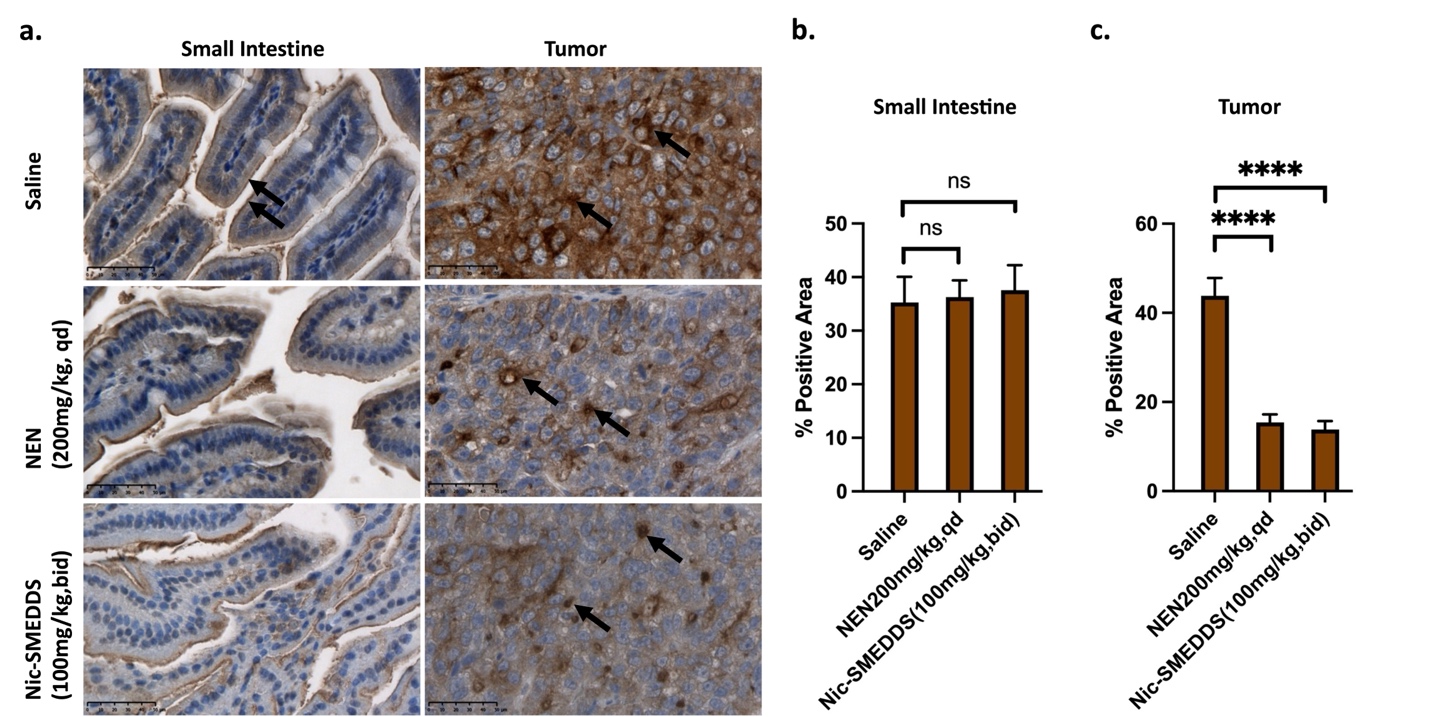
**

**Figure S7. Representative immunohistochemical (IHC) staining of P-gp protein.** **(a)** Expression and localization of P-gp in the small intestinal mucosa, and PDX tissue from the Nic-SMEDSS (100mg/kg, bid) and NEN (200mg/kg, equivalent to niclosamide, qd) groups. Saline-treated mice were used as the negative control. Black arrows indicate positive stains. Magnification: 40x, Scale: 50 µm). Quantitative analysis of positive P-gp staining in **(b)** small intestine (Threshold 115/158, detected area 739,689), and **(c)** PDX (Threshold 0/90, detected area 739,689) was performed using the Image J software. Data were plotted as mean ± SEM, n = 3. Statistical analysis using one-way ANOVA; **** denotes *p* < 0.0001; ns denotes no significance.


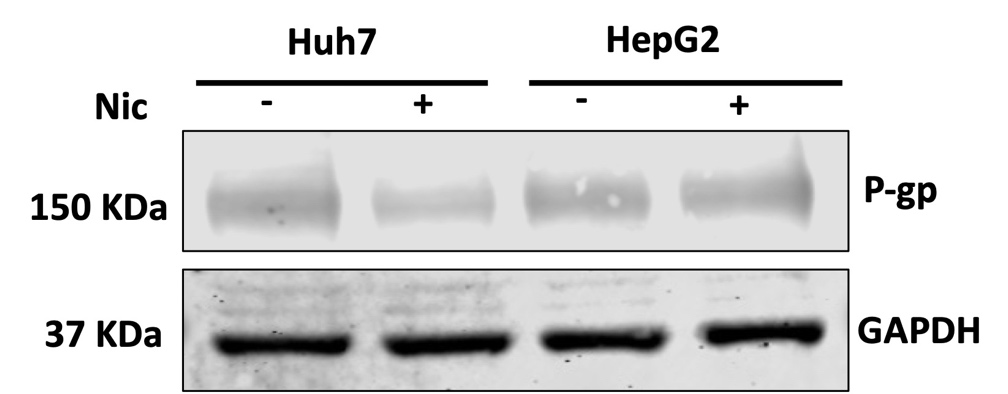


**Figure S8.** **Detection of P-gp protein expression in HCC cell lines, Huh7 and HepG2.** Cells were treated with 1 µM of niclosamide (Nic) for 48 h. GAPDH served as the internal loading control for immunoblotting analysis.


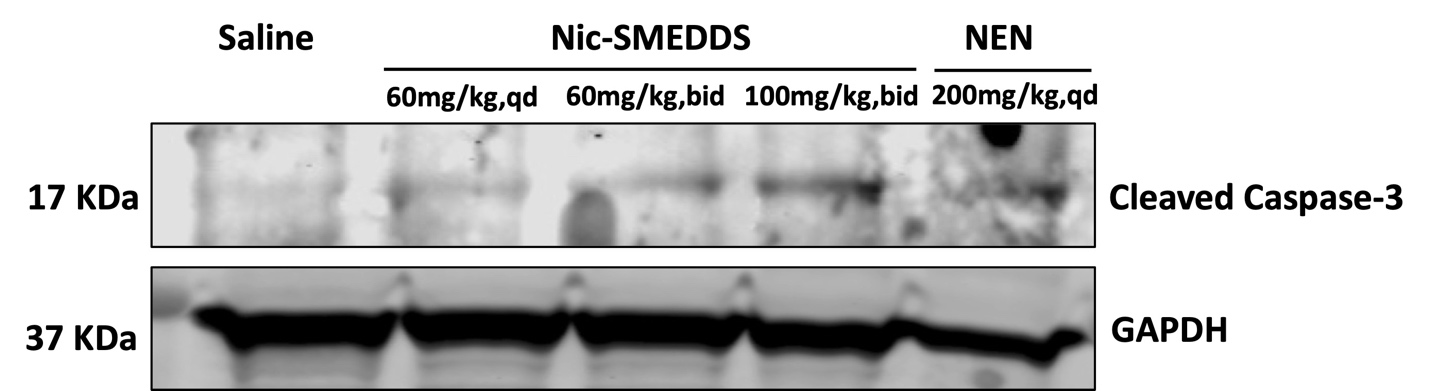


**Figure S9.** **Detection of cleaved Caspase-3 protein expression in tumor tissues after different treatment conditions.** Tumor tissues were harvested from *in vivo* efficacy study, and whole cell lysates extracted for immunoblotting analysis of cleaved Caspase-3 protein levels. GAPDH was used as the internal loading control.
